# Supplementary material for: NUP98 and RAE1 sustain progenitor function through HDAC-dependent chromatin targeting to escape from nucleolar localization
Source: PubMed Central journal article supplement (PMC10290086; doi:10.1038/s42003-023-05043-2), 2023-06-23
Supplement: 42003_2023_5043_MOESM3_ESM.pdf [file 42003_2023_5043_MOESM3_ESM.pdf]

## Description of Additional Supplementary Files

**File name:** Supplementary Data 1

**Description:** Differentially Expressed Genes with NUP98 knockdown

**File name:** Supplementary Data 2

**Description:** Differentially Expressed Genes with RAE1 or NUP98 knockdown

**File name:** Supplementary Data 3

**Description:** NUP98\_ChIP\_peaks\_UD(1554)

**File name:** Supplementary Data 4

**Description:** Co-occupancy at NUP98 ChIP-seq peaks by other marks/regulators in human primary keratinocytes

**File name:** Supplementary Data 5

**Description:** NUP98 ChIP direct target genes (101).

**File name:** Supplementary Data 6

**Description:** Differentially Expressed Genes with HDAC inhibition.

**File name:** Supplementary Data 7

**Description:** List of Oligos Used in This Study

**File name:** Supplementary Data 8

**Description:** Source Data behind the graphs in this manuscript
